# Supplementary material for: miR398 Attenuates Heat-Induced Leaf Cell Death via Its Target CSD1 in Chinese Cabbage
Source: MDPI journal article supplement (doi:10.3390/horticulturae8040299), 2022-03-31
Supplement: s1 [file s1]

## Supplementary Figure

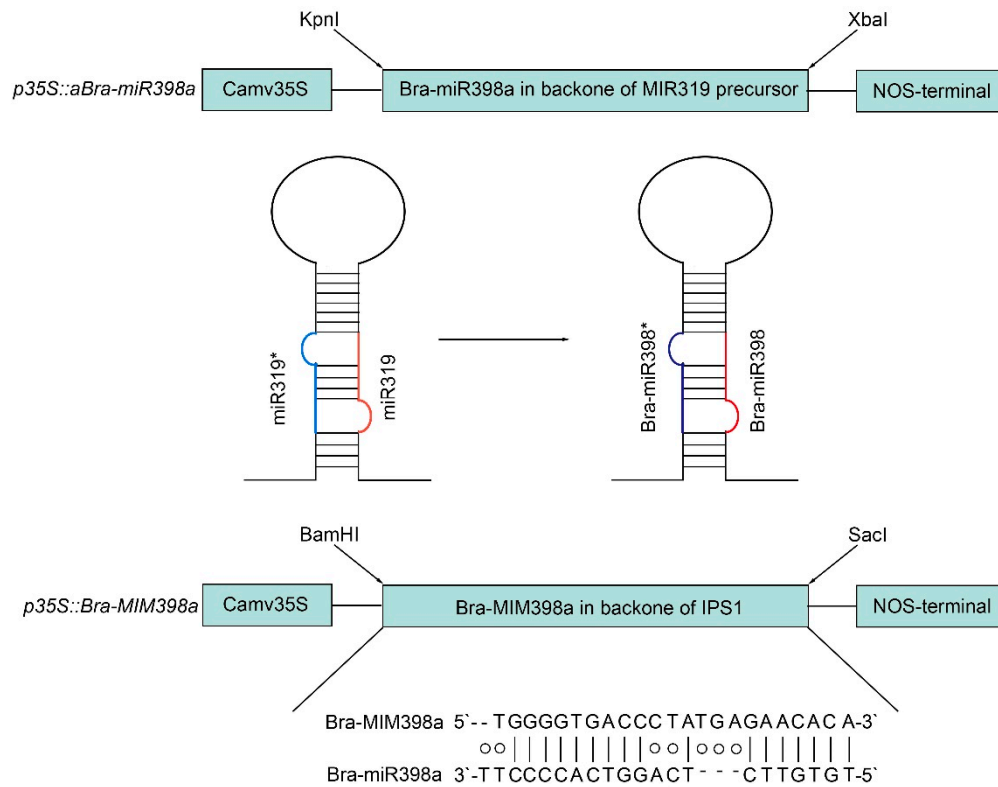

**Supplementary Figure 1.** Overview of vector construction for amiR398 and MIM398.

Construct of artificial Bra-miR398a in the backbone of *MIR319a* vector (*p35S::aBra-miR398a*) and vector of mimicry Bra-miR398a (BraMIM398) using the backbone of IPS1 gene (*p35S::Bra-MIM398a*).

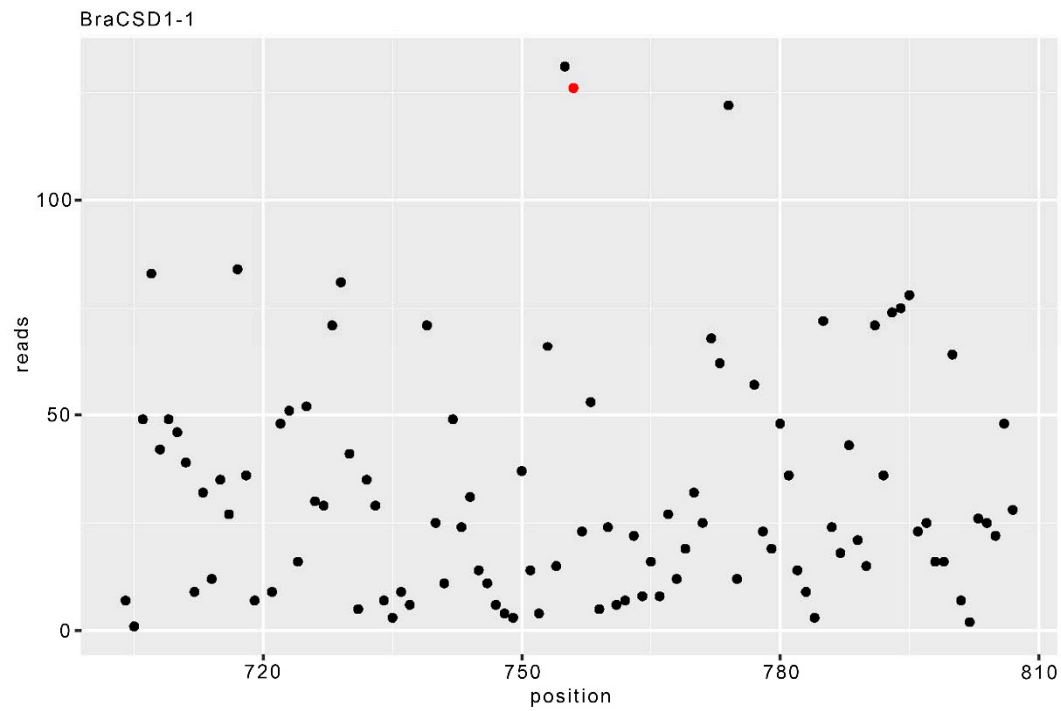

**Supplementary Figure 2.** The distribution of 5'P end reads around the miR398 target sites at BraCSD1-1 revealed by Degradome analysis. The red dot indicates the 5'P reads of miR398 cleavage sites at *BraCSD1-1*.
