# Supplementary material for: miR398 Attenuates Heat-Induced Leaf Cell Death via Its Target CSD1 in Chinese Cabbage
Source: MDPI journal article supplement (doi:10.3390/horticulturae8040299), 2022-03-31
Supplement: s1 [file s1]

**TABLE S1.** Primers used in this study

| Primers         | Sequences (5'-3')                                  | Usage                                                   |
|-----------------|----------------------------------------------------|---------------------------------------------------------|
| NPTII-R         | GACCACCAAGCGAAACAT                                 | Identification of transgenic lines                      |
| NPTII-F         | GGCGATACCGTAAAGCAC                                 |                                                         |
| Actin-S         | TGGCATCAYACTTTCTACAA                               | Real-time PCR of <i>Actin</i>                           |
| Actin-A         | CCACCACTDAGCACAATGTT                               |                                                         |
| BraCSD1-S1      | ATGGCCAAGGGAGTTGCAGTT                              | <i>p35S:BracCSD1</i> construct and 5' RACE outer primer |
| BraCSD1-459A    | TTAGCCCTGAAGACCAATAATACC                           |                                                         |
| amiRNA-A        | CTGCAAGGCGATTAAGTTGGGTAAC                          | <i>p35S:amiR398a</i> construct                          |
| BraamiR398-IVa  | GAAGTGTTTACAGGTCACCCTTTTCTACATATATATTCCT           |                                                         |
| BraamiR398-IIa  | GAAAGGGGTGACCTGAGAACACATCAAAGAGAATCAATGA           |                                                         |
| BraamiR398-IIIs | GAAAAGGGGTGACCTGTGAACACTTCA CAGGTCGTGATATG         |                                                         |
| BraamiR398-Is   | GATGTGTTCTCAGGTCACCCCTTTCTCTCTTTTGTATTCC           |                                                         |
| amiRNA-B        | GCGGATAACAATTTACACAGGAAACAG                        | <i>p35S:MIM398a</i> construct                           |
| IPS-1S-BamH1    | GTGGATCCAAGAAAAATGGCCATCCCCTAGC                    |                                                         |
| BraMIM398a-Ia   | CTTGTGTTCTCATAGGGTCACCCCATTTCTAGAGGGAGATAA         |                                                         |
| BraMIM398a-IIIs | AATGGGGTGACCCTATGAGAACACAAGCTTCGGTTCCCTCG          |                                                         |
| IPS-522A-SalI   | ACGCGTCGACGAGGAATTCCTATAAAGAGAATCG                 | Real-time PCR of Bra-miR398                             |
| Bra-miR398-RT   | GTCGTATCCAGTGCAGGGTCCGAGGTATTCGCACTGGATACGACCAGGGG |                                                         |
| Bra-miR398-S    | CGGCGTGTGTTCTCAGGTCA                               |                                                         |
| Universal-A     | GTGCAGGGTCCGAGGT                                   | Real-time PCR of <i>BraCSD1</i>                         |
| BraCSD1-S54     | CCCTGAGATCACAAAGGATATACAA                          |                                                         |
| BraCSD1-143A    | TGAAGAAGARAGTCCCCTTAACACC                          | Real-time PCR of <i>BraCSD2</i>                         |
| BraCSD2-S327    | ATGCATCTCAACAGGGCCACAT                             |                                                         |
| BraCSD2-516A    | AACCACAAAGGCTCTCCCAACA                             | Real-time PCR of <i>BraLEA76</i>                        |
| BraLEA76-S392   | GAGAAGCCATAAAGCAGAAG                               |                                                         |
| BraLEA76-641A   | CCAGTAGTGGTCGTAGTTGT                               | Real-time PCR                                           |
| BraDREB2A-S536  | TGAAGAAGGAGGTGAAGGTAGA                             |                                                         |

|                |                           |                                    |
|----------------|---------------------------|------------------------------------|
| BraDREB2A-822A | CTGGTCCAAGCCTGTAAAGATG    | of <i>BraDREB2A</i>                |
| BraP5CS-253S   | CAGAAGCCACAGACTGAACTTG    | Real-time PCR<br>of <i>BraP5CS</i> |
| BraP5CS-386A   | AAACTGCTATCAGTCACCAGCA    |                                    |
| BraPLC-145S    | CTGATCGATGTTCAGAAGCAAG    | Real-time PCR<br>of <i>BraPLC</i>  |
| BraPLC-245A    | TCGAGGTGGAGACCGTTACTAT    |                                    |
| BraCaM1-96S    | ACTTGGGACTGTGATGAGGTCT    | Real-time PCR<br>of <i>BraCaM1</i> |
| BraCaM1-220A   | CCATCAGGTTTAGGAACTCAGG    |                                    |
| BraCSD1-1-174A | AGACATGCAACCGTTGGTGGTGTCA | 5' RACE inner<br>primer            |
| U6-biotin      | TCATCCTTGCGCAGGGGCCA      | Northern blot                      |
| miR398-biotin  | AAGGGGTGACCTGAGAACACA     | Northern blot                      |
