# Supplementary material for: miR398 Attenuates Heat-Induced Leaf Cell Death via Its Target CSD1 in Chinese Cabbage
Source: MDPI journal article supplement (doi:10.3390/horticulturae8040299), 2022-03-31
Supplement: s1 [file s1]

**Supplementary Table 2. The sequence conservation among Brp-MIR398a, Brp-MIR398b and Brp-CSD to its *Arabidopsis* homologs at amino acid level.**

| miR398 and targets in <i>Arabidopsis</i> | Homologous in <i>Brassica rapa</i> | homology |
|------------------------------------------|------------------------------------|----------|
| ath-miR398a                              | Bra-MIR398a1                       | 70.8%    |
|                                          | Bra-MIR398a2                       | 74.7%    |
| ath-miR398b                              | Bra-MIR398b1                       | 64.4%    |
|                                          | Bra-MIR398b2                       | 75.5%    |
| ath-miR398c                              |                                    |          |
| AtCSD1 (At1g08830)                       | BraCSD1-1 (Bra031642)              | 93.4%    |
|                                          | BraCSD1-2 (Bra018596)              | 34.7%    |
| AtCSD2 (At2g28190)                       | BraCSD2-1 (Bra034394)              | 85.2%    |
|                                          | BraCSD2-2 (Bra011971)              | 61.1%    |
| AtCCS (At1g12520)                        | BraCCS-1 (Bra016768)               | 87.5%    |
|                                          | BraCCS-2 (Bra026968)               | 53.1%    |
